# Supplementary material
Source: Springer Nature journal article supplement (https://www.springermedizin.de/resource/supplementary/12967_2012_1461_MOESM4_ESM.pdf/9574784)

**A**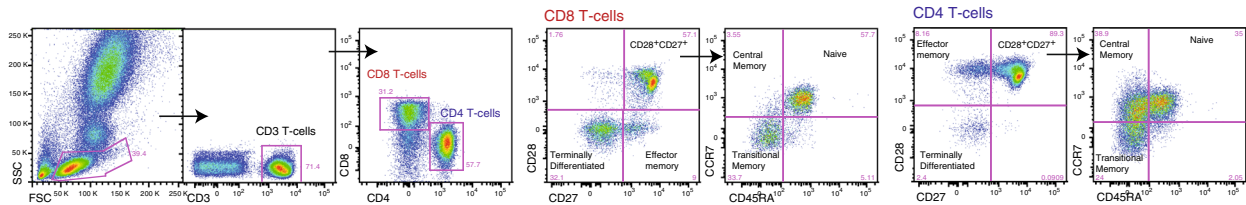**B**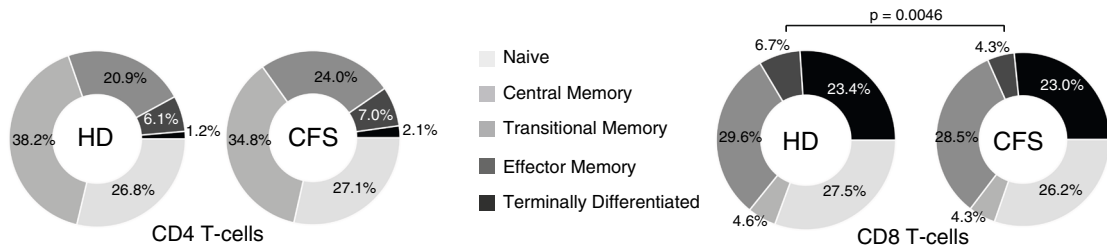**C**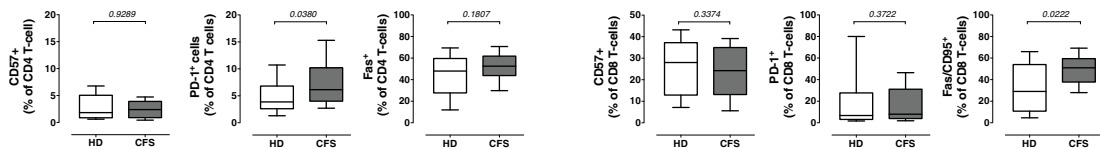

Supplement: MOESM4 [file 9574784]
